# Supplementary material for: Music in premature infants enhances high-level cognitive brain networks
Source: PubMed Central journal article supplement — Proc Natl Acad Sci U S A. 2019 May 28;116(24):12103–8. doi: 10.1073/pnas.1817536116 (PMC6575179; doi:10.1073/pnas.1817536116), 2019-05-28
Supplement: pnas.1817536116.sapp.pdf [file pnas.1817536116.sapp.pdf]

# Supporting Information

## Supporting Information

### SI Figures

Figure S1: Flow chart of the participant selection process.

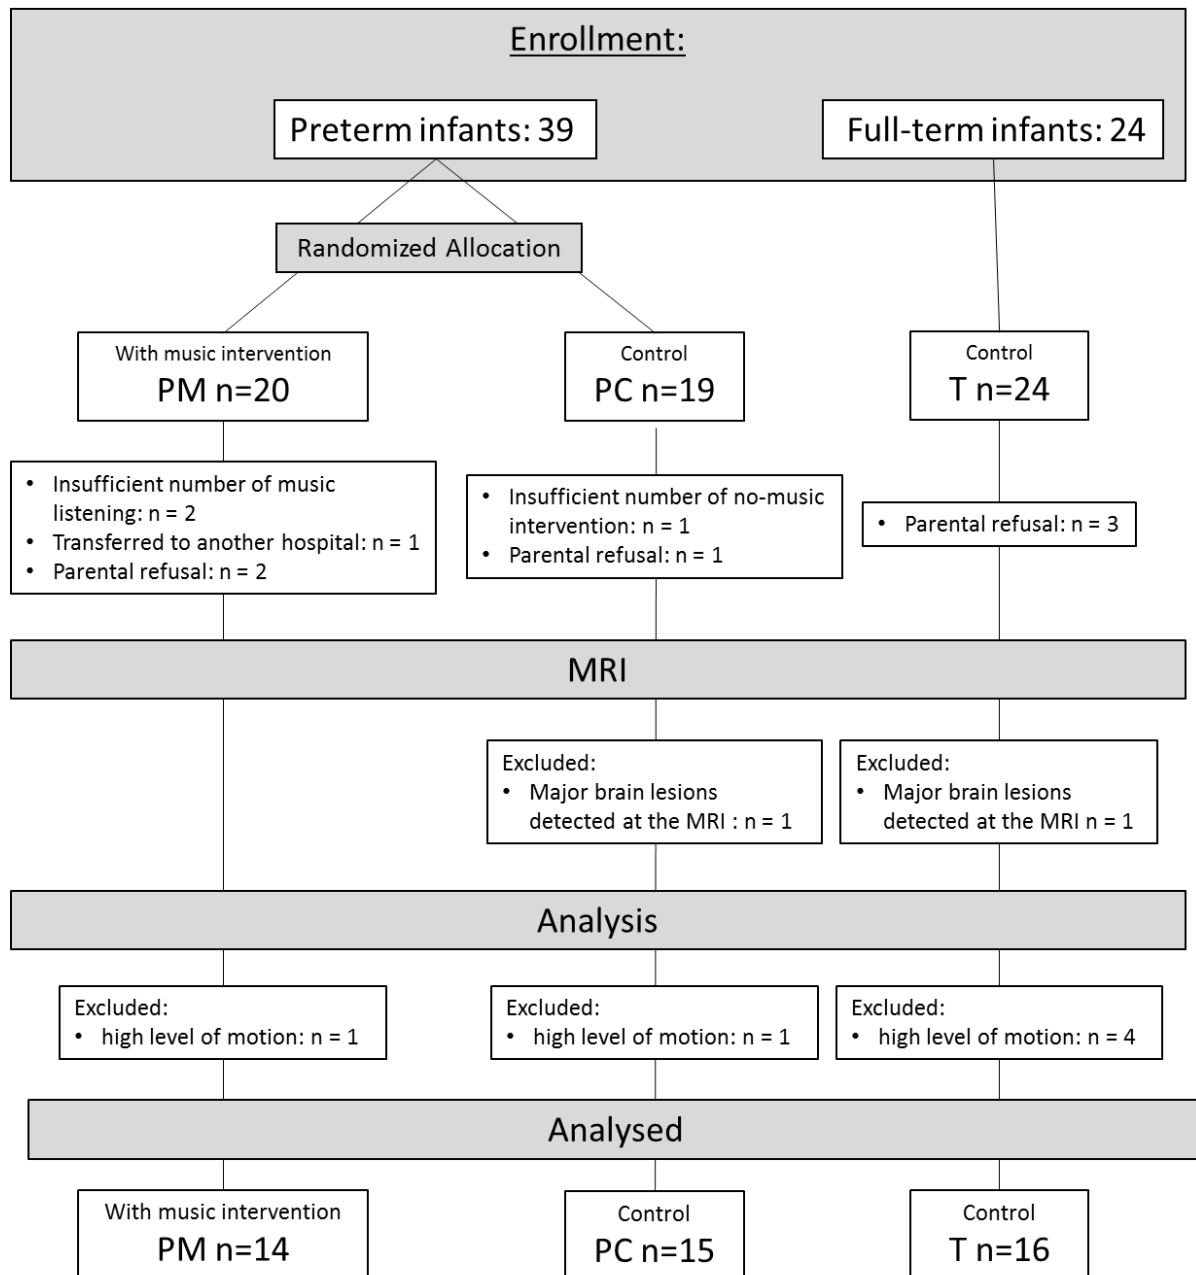

*Figure S2:* Methodological pipeline.

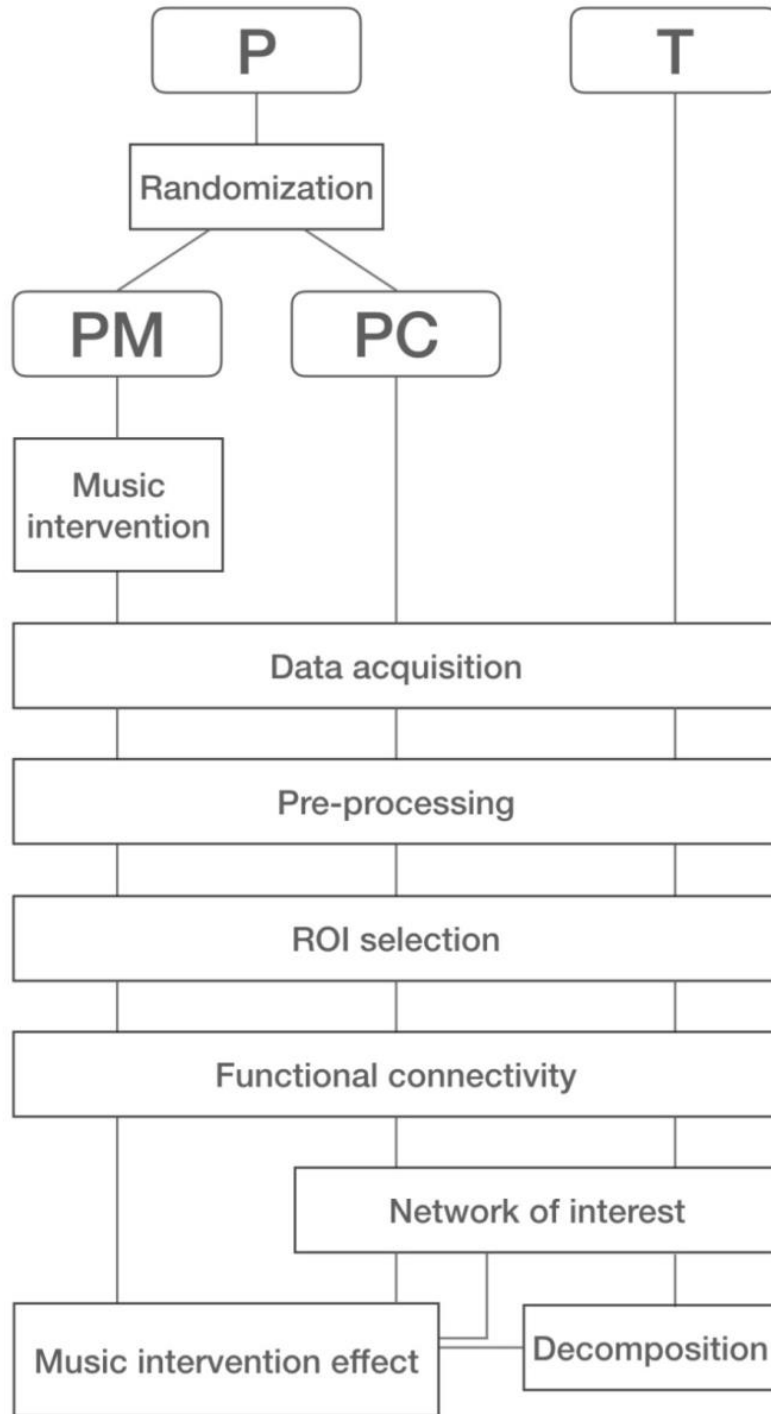

*Figure S3: Auditory spectrum of the three music tracks used: a. to help the baby to wake up; b. to interact with an awake baby; and c. to support the baby fall asleep.*

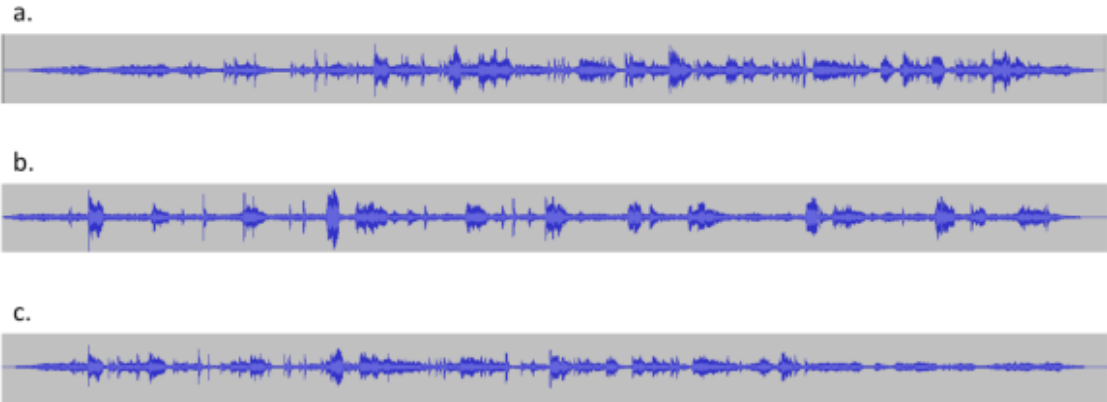

Figure S4: COI including salience node. Red connections represent interconnections between modules. The modularity of this decomposition is 0.29.

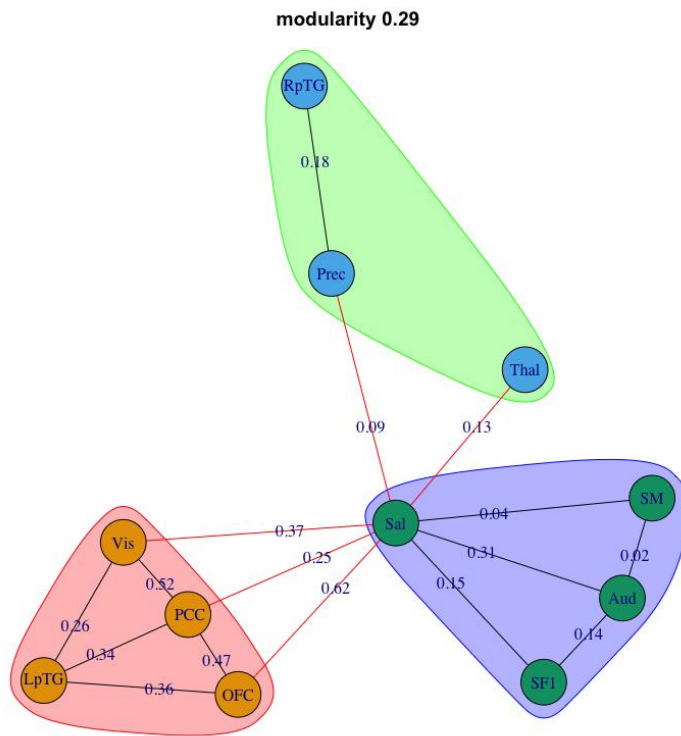

Figure S5: COI without salience node. The modularity of this decomposition is 0.53

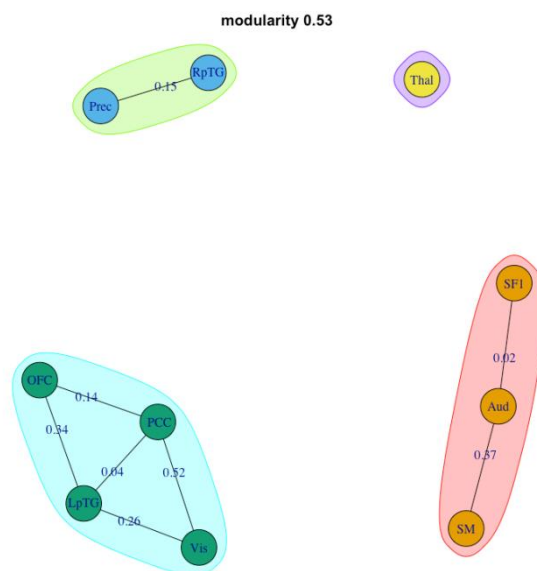

## SI Tables:

Table S1: Subjects informations

Statistics: Fisher's exact test was used for categorical data, and the Mann-Whitney test and ANOVA were used for continuous data to compare subgroups. SGA, small for gestational age (<10<sup>th</sup> percentile for birth weight as a function of GA and gender). Socioeconomic status was estimated using a 2-to-12-point scale consisting of the addition of maternal education (range 1-6 points) and paternal occupation (range 1-6 points). Lower scores reflect a higher socioeconomic class.

|                                                                   | Preterm group<br>with music<br>n=14<br>n (%) or mean<br>(SD) | Preterm<br>group<br>without<br>music<br>n=15<br>n (%) or mean<br>(SD) | p-value<br><br>(between<br>preterm<br>groups) | Full-term group<br>n=16<br>n (%) or mean<br>(SD) | p-value<br><br>(between<br>the 3<br>groups) |
|-------------------------------------------------------------------|--------------------------------------------------------------|-----------------------------------------------------------------------|-----------------------------------------------|--------------------------------------------------|---------------------------------------------|
| GA (weeks)                                                        | 28.3 (2)                                                     | 29 (1.8)                                                              | 0.4                                           | 39.5 (1.1)                                       | N.A.                                        |
| Birthweight (g)                                                   | 1050 (262)                                                   | 1161 (287)                                                            | 0.28                                          | 3333 (334)                                       | N.A.                                        |
| SGA                                                               | 1/14 (7%)                                                    | 2/15 (13.3%)                                                          | 1.0                                           | 0/16                                             | N.A.                                        |
| Microcephaly                                                      | 2/14 (14%)                                                   | 5/15 (33%)                                                            | 0.4                                           | 0/16                                             | N.A.                                        |
| Male                                                              | 5/14 (36%)                                                   | 7/15 (47%)                                                            | 0.7                                           | 7/16 (44%)                                       | 0.87                                        |
| Socioeconomic status                                              | 5.5 (3.6)                                                    | 6.3 (3.5)                                                             | 0.44                                          | 4.5 (3.06)                                       | 0.35                                        |
| Antenatal steroids                                                | 5/14 (36%)                                                   | 8/15 (53%)                                                            | 0.46                                          | N.A.                                             | N.A.                                        |
| Cesarean section                                                  | 10/14 (71%)                                                  | 11/15 (73%)                                                           | 1.0                                           | 5/16 (58%)                                       | 0.04                                        |
| Chorioamnionitis                                                  | 4/14 (29%)                                                   | 1/15 (7%)                                                             | 0.16                                          | N.A.                                             | N.A.                                        |
| Bronchopulmonary<br>dysplasia<br><i>- mild and moderate level</i> | 4/14 (29%)                                                   | 5/15 (33%)                                                            | 1.0                                           | N.A.                                             | N.A.                                        |
| Patent ductus arteriosus<br><i>Medical or surgical treatment</i>  | 1/14 (7.1%)                                                  | 2/15 (13%)                                                            | 0.52                                          | N.A.                                             | N.A.                                        |
| Sepsis                                                            | 2/14 (14%)                                                   | 4/15 (27%)                                                            | 0.65                                          | N.A.                                             |                                             |
| GA at scan (weeks)                                                | 40.4 (0.75)                                                  | 40.5 (0.8)                                                            | 0.6                                           | 39.8 (1)                                         | 0.045                                       |

*Table S2: Regions of interest obtained based on ICA results. The number of voxels in each resting-state network and network labels are shown.*

| Number of the component | RSN                             | Abbreviations | Anatomical location                                                                                                                                  | Number of voxels |
|-------------------------|---------------------------------|---------------|------------------------------------------------------------------------------------------------------------------------------------------------------|------------------|
| 1                       | Visual                          | Vis           | Bilateral occipital lobe                                                                                                                             | 1411             |
| 2                       | Sensorimotor                    | SM            | Bilateral precentral gyrus<br>Bilateral postcentral gyrus                                                                                            | 1527             |
| 3                       | Superior Frontal                | SF 1          | Bilateral medial superior frontal cortex                                                                                                             | 1152             |
| 4                       | Cerebellum                      | Cer           | Bilateral cerebellum                                                                                                                                 | 2206             |
| 5                       | Noise                           | Noise         | motion                                                                                                                                               | 1738             |
| 6                       | Posterior cingulate cortex      | PCC           | Bilateral precuneus gyrus<br>Posterior cingulate cortex                                                                                              | 1520             |
| 7                       | Noise                           | Noise         | blood vessels                                                                                                                                        | 488              |
| 8                       | Precuneus                       | Prec          | Bilateral Precuneus                                                                                                                                  | 1075             |
| 9                       | Auditory cortex                 | Aud           | Superior temporal gyrus (primary and secondary auditory cortex)<br>Perigenual anterior cingulate cortex                                              | 808              |
| 10                      | Noise                           | Noise         | motion                                                                                                                                               | 31               |
| 11                      | Right posterior temporal cortex | RpTG          | Right osterior superior temporal gyrus<br>Right posterior middle temporal gyrus                                                                      | 533              |
| 12                      | Left posterior temporal         | LpTG          | Left posterior superior temporal gyrus<br>Left posterior middle temporal gyrus                                                                       | 795              |
| 13                      | Superior frontal                | SF 2          | Superior frontal gyrus<br>Middle frontal gyrus<br>Inferior frontal gyrus, orbital part                                                               | 1295             |
| 14                      | Orbitofrontal                   | OFC           | Medial orbital cortex and gyrus rectus<br>Inferior temporopolar region<br>Planum polare                                                              | 800              |
| 15                      | Salience                        | Salience      | Insula<br>Perigenual cingulate cortex                                                                                                                | 561              |
|                         | Thalamus                        | Thal          | Mesencephalum<br>Thalamus : anteroventral thalamus, ventral anterior thalamic nucleus, anterior thalamus nucleus<br>Dorsal anterior cingulate cortex | 139              |
| 16                      | Brainstem and Thalami           | Bst+Tha       | Brainstem : mesencephalus, pons,<br>Thalamus, anterior thalamic nucleus                                                                              | 593              |

*Table S3: Global analysis of differences between PC and PM groups.*

|         | Region 1 | Region 2 | uncorrected P.values | corrected P.values |
|---------|----------|----------|----------------------|--------------------|
| PM > PN | Vis      | SM       | 0,069                | 1                  |
|         | SM       | Aud      | 0,020                | 1                  |
|         | SM       | Sal      | 0,044                | 1                  |
|         | SM       | Thal     | 0,074                | 1                  |
|         | SM       | Bst&Tha  | 0,046                | 1                  |
|         | Prec     | Sal      | 0,087                | 1                  |
|         | Prec     | Thal     | 0,054                | 1                  |
|         | Aud      | Bst&Tha  | 0,049                | 1                  |
|         | RpTG     | Sal      | 0,100                | 1                  |
|         | RpTG     | Bst&Tha  | 0,029                | 1                  |
|         | Sal      | Bst&Tha  | 0,096                | 1                  |
|         | PM < PN  | Cer      | Prec                 | 0,032              |
| RpTG    |          | OFC      | 0,045                | 1                  |

## **SI Sound files**

*Sound file S1: Music track used to help the baby to wake up*

*Sound file S2: Music track used to interact with an awake baby*

*Sound file S3: Music track used to help the baby fall asleep*
